# Supplementary material for: Fluc‐EGFP reporter mice reveal differential alterations of neuronal proteostasis in aging and disease
Source: PubMed Central journal article supplement (PMC8488555; doi:10.15252/embj.2020107260), 2021-08-19

### Source Data for Fig 1

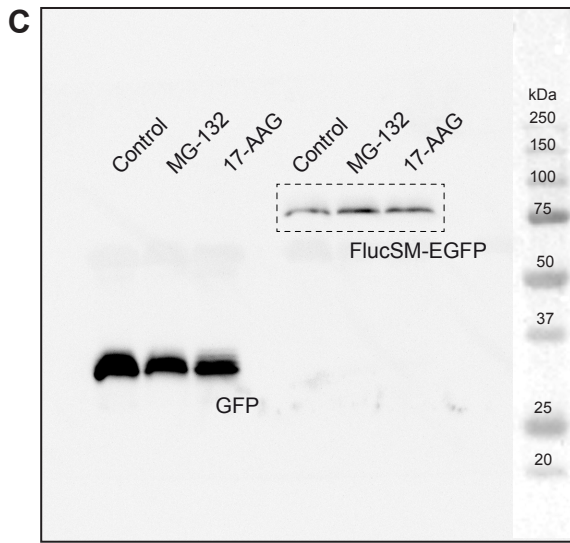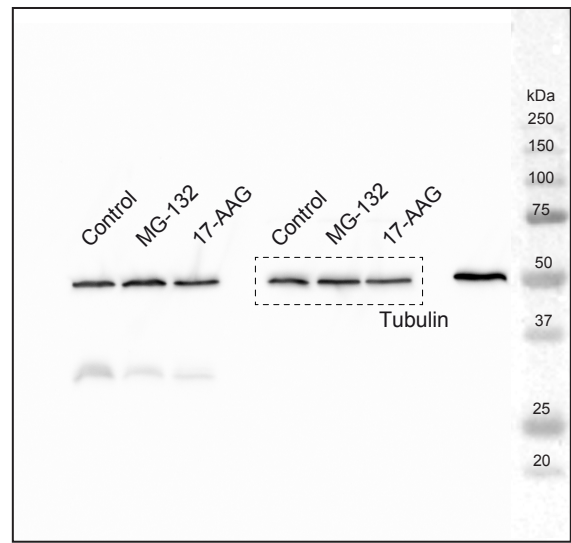

Supplement: EMBJ-40-e107260-s002.pdf [file EMBJ-40-e107260-s002.pdf]
