# Supplementary material for: Fluc‐EGFP reporter mice reveal differential alterations of neuronal proteostasis in aging and disease
Source: PubMed Central journal article supplement (PMC8488555; doi:10.15252/embj.2020107260), 2021-08-19
Supplement: EMBJ-40-e107260-s004.pdf [file EMBJ-40-e107260-s004.pdf]

## Appendix

### Novel reporter mouse reveals neuronal proteostasis alterations in aging and disease

Sonja Blumenstock<sup>1,2,\*</sup>, Elena Katharina Schulz-Trieglaff<sup>1,\*</sup>, Kerstin Voelkl<sup>1,2</sup>, Anna-Lena Bolender<sup>1,2</sup>, Paul Lapios<sup>1,2</sup>, Jana Lindner<sup>1</sup>, Mark S. Hipp<sup>3,4,5</sup>, F. Ulrich Hartl<sup>3</sup>, Rüdiger Klein<sup>1</sup> and Irina Dudanova<sup>1,2</sup>

#### Table of contents

Appendix Figure S1. Control experiments for proteotoxic stress treatments.

Appendix Figure S2. Further characterization of Fluc-EGFP mice.

Appendix Figure S3. Co-expression of Fluc-EGFP variants with control HTT, and analysis of subcellular localization of mHTT and  $\beta$ 23 variants.

Appendix References

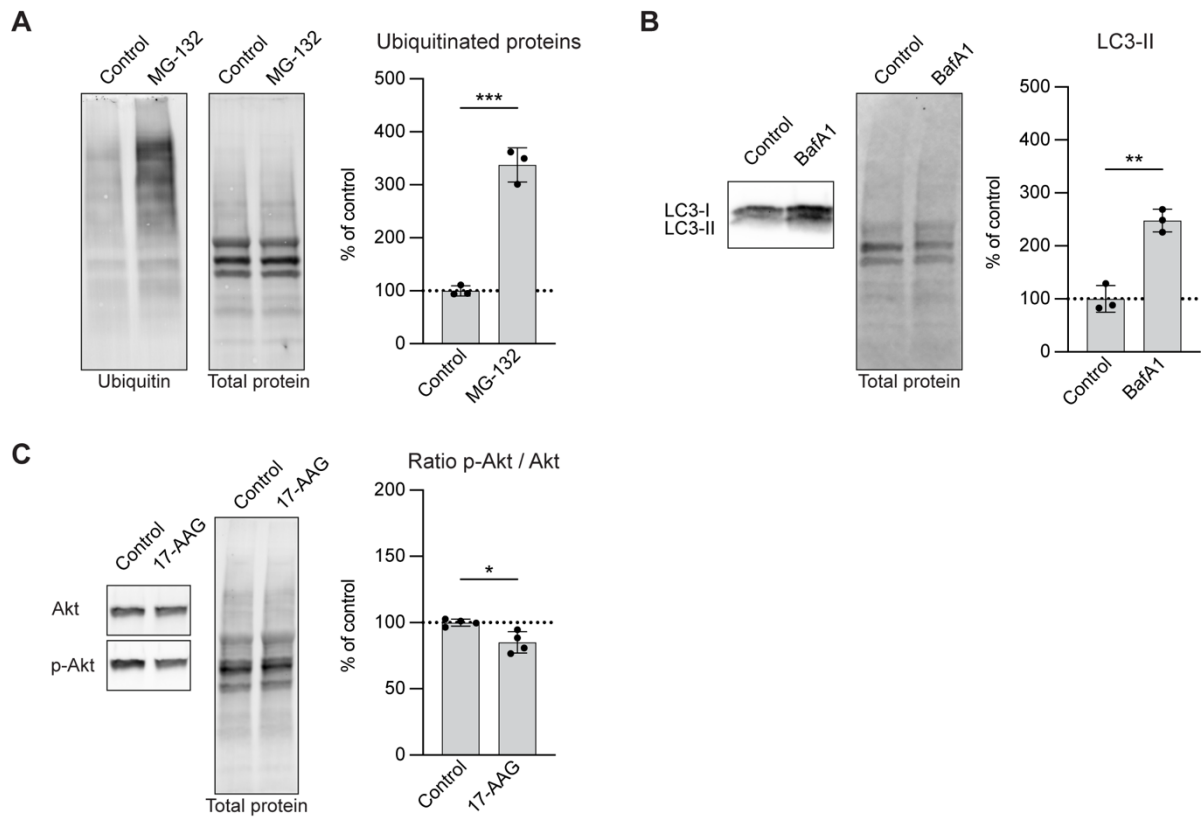

**Appendix Figure S1. Control experiments for proteotoxic stress treatments.**

**A**, Left, Western blot of primary neurons transfected with FlucWT-EGFP and treated with 5  $\mu$ M MG-132 at DIV 3+2 for 4 hours. Ubiquitination levels were normalized to total protein. Right, quantification of ubiquitinated proteins in MG-132 vs. vehicle-treated lysates. N=3 biological replicates. Two-tailed t-test.

**B**, Left, Western blot of primary neurons transfected with FlucWT-EGFP and treated with 10 nM Bafilomycin A1 (BafA1) at DIV 3+2 for 24 hours. LC3B-II levels were normalized to total protein. Right, quantification of LC3B-II in neuronal lysates. N=3 biological replicates. Two-tailed t-test.

**C**, Left, Western blot of primary neurons treated with 0.5  $\mu$ M 17-AAG at DIV 5 for 24 hours. Right, quantification of phospho-Akt / total Akt ratio as a readout of Hsp90 inhibition (Chen et al., 2020). N=4 biological replicates. Two-tailed t-test.

Data information: Error bars represent SD. Significance: \* $p < 0.05$ ; \*\* $p < 0.01$ ; \*\*\* $p < 0.001$ .

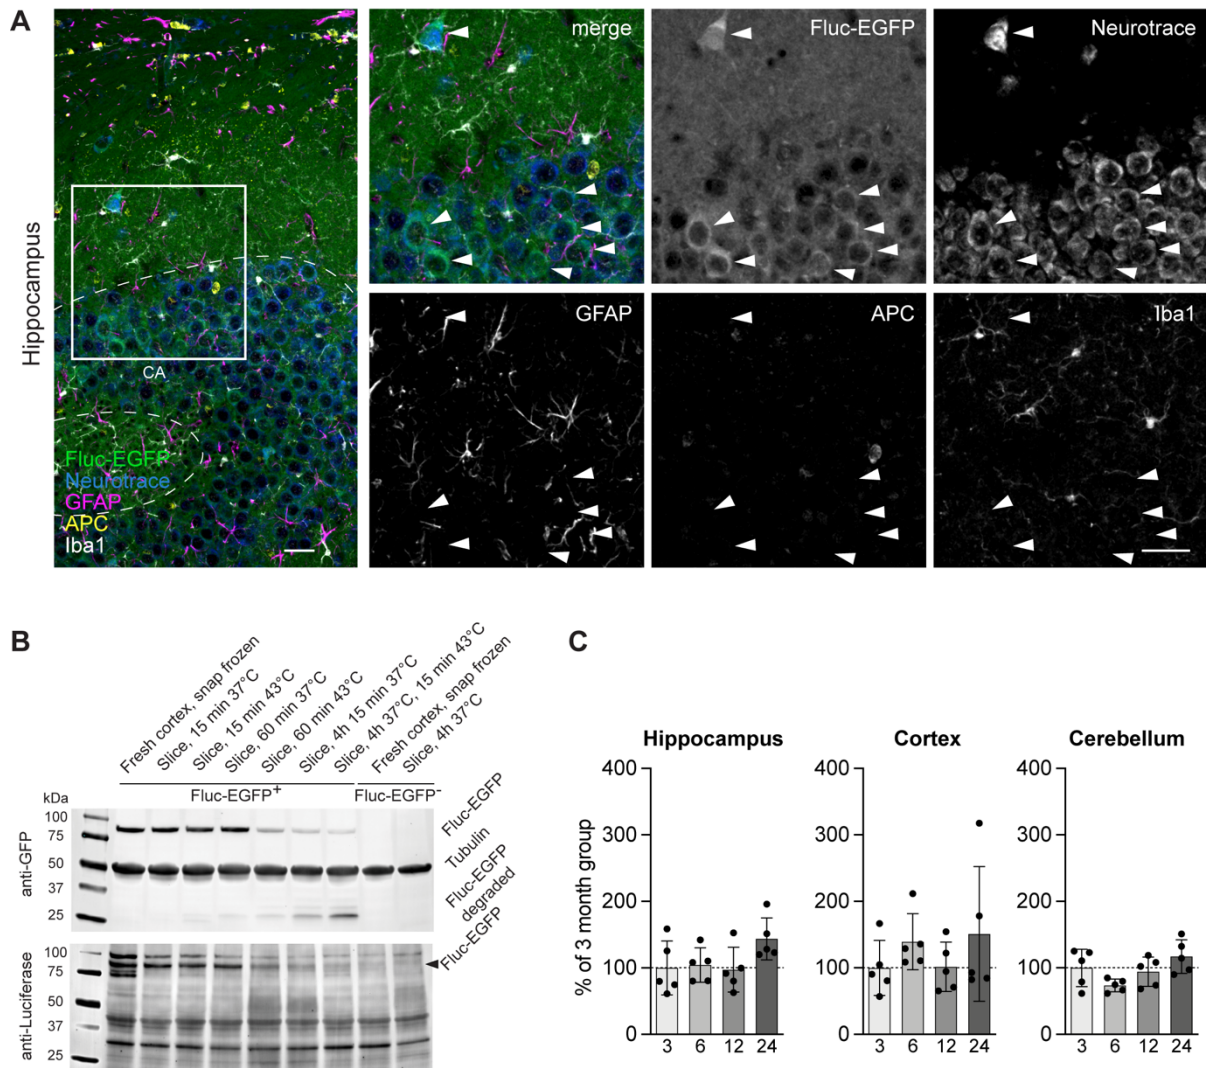

### Appendix Figure S2. Further characterization of Fluc-EGFP mice.

**A**, Analysis of Fluc-EGFP expression in neurons and glia in the hippocampus of 3-4-month-old Fluc-EGFP mice. Brain sections were stained against GFAP (magenta), APC (yellow), and Iba1 (white). Fluc-EGFP was detected by EGFP fluorescence (green), neurons were labeled with Neurotrace (blue). Hippocampal CA layer is marked with dashed lines. Arrowheads in the higher magnification images point to Fluc-EGFP-positive cells. The experiment was repeated in N=5 animals with similar results.

**B**, Acute brain slices from Fluc-EGFP mice or non-transgenic controls were kept at 37°C or heat shocked at 43°C for the indicated periods of time. Western blots for GFP (top) and luciferase (bottom) are shown. Note the decrease in Fluc-EGFP band and appearance of lower molecular weight Fluc-EGFP degradation products after prolonged incubation. For all further experiments, only the GFP antibody was used, because it produced less unspecific signal than the luciferase antibody.

**C**, Analysis of Fluc-EGFP protein quantity in the indicated brain regions of Fluc-EGFP mice at different ages. Same data as in Fig. 2F, but normalized to total protein instead of tubulin. One-way ANOVA with Bonferroni's multiple comparisons test: not significant for all groups.

Data information: Error bars represent SD. Scale bars in A, 30  $\mu$ m.

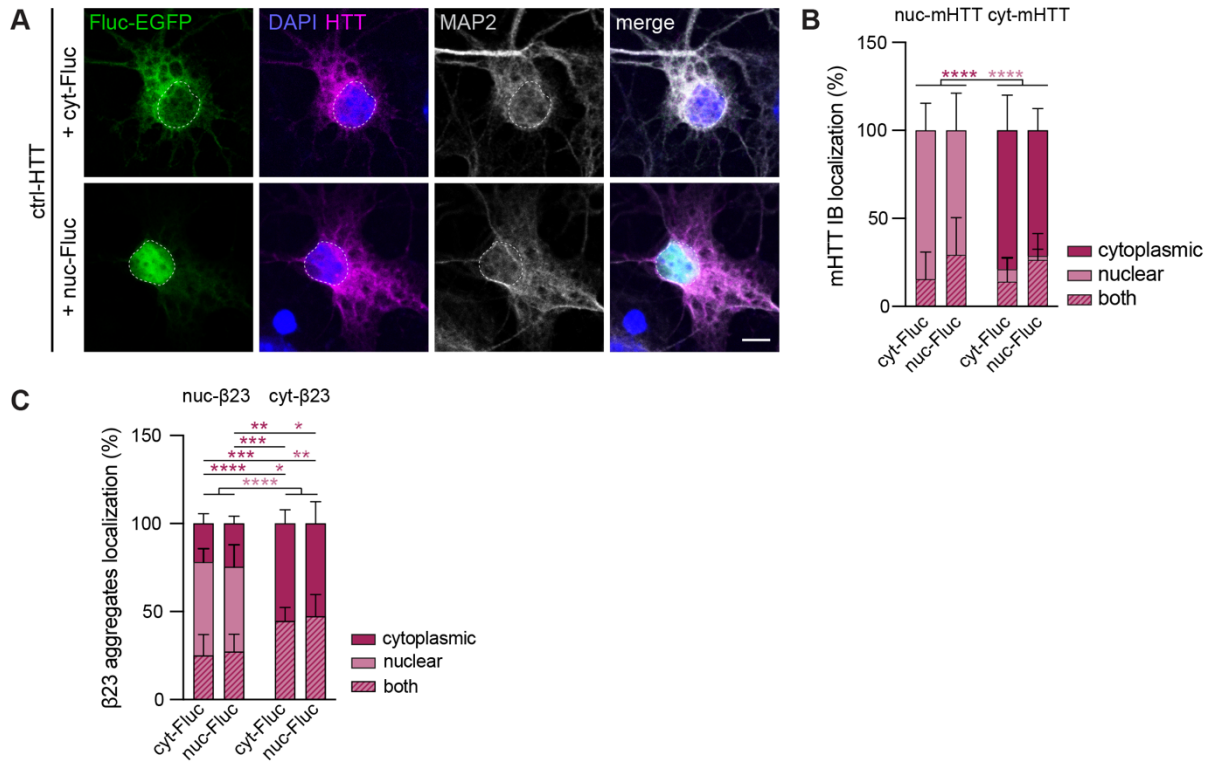

**Appendix Figure S3. Co-expression of Fluc-EGFP variants with control HTT, and analysis of subcellular localization of mHTT and β23 variants.**

**A**, Primary cortical neurons transfected with cyt-Fluc-EGFP (upper row) or nuc-Fluc-EGFP (lower row) (green), in combination with control HTT-exon1 (HTT-Q25-mCherry, magenta). Cells were fixed at DIV 3+2 and stained for the neuronal marker MAP2 (grey). Nuclei were labeled with DAPI (blue). Dashed lines mark the nuclei. Corresponding cultures transfected with mHTT constructs are shown in Fig. 5A-B.

**B**, Quantification of mHTT IB localization in the cytoplasm, nucleus, or both in the indicated conditions. Three-way ANOVA with Tukey's multiple comparisons test. ANOVA: Localization, \*\*p=0.0049; HTT, n.s.; Fluc, n.s.; Localization x HTT, \*\*\*\*p<0.0001; Localization x Fluc, n.s.; HTT x Fluc, n.s.; Localization x HTT x Fluc, n.s. Dark-red and light-red asterisks indicate significant pairwise comparisons of the fractions of cells with mHTT IBs localized in the cytoplasm and in the nucleus, respectively.

**C**, Quantification of β23 aggregate localization in the cytoplasm, nucleus, or both in the indicated conditions. Three-way ANOVA with Tukey's multiple comparisons test. ANOVA: Localization, \*\*p=0.0012; β23, n.s.; Fluc, n.s.; Localization x β23, \*\*\*\*p<0.0001; Localization x Fluc, n.s.; β23 x Fluc, n.s.; Localization x β23 x Fluc, n.s. Dark-red, light-red and striped asterisks indicate significant pairwise comparisons of the fractions of cells with aggregates in the cytoplasm, in the nucleus, and in both compartments, respectively.

Data information: Error bars represent SD. Significance: \*p<0.05; \*\*p<0.01; \*\*\*p<0.001; \*\*\*\*p<0.0001. Scale bar in A, 5 μm.

**Appendix References**

Chen, F., Xie, H., Bao, H., Violetta, L., and Zheng, S. (2020). Combination of HSP90 and autophagy inhibitors promotes hepatocellular carcinoma apoptosis following incomplete thermal ablation. *Mol Med Rep* 22, 337-343.
